# Supplementary material
Source: publisher site journal article supplement (https://www.dovepress.com/article/275321)
Supplement: Supplementary file 1 [file get_supplementary_file.php]

**Supplementary**

**Table S1.** The Bisulfite Specific Primers of *RAPSN*

| **Primer** | **Sequences** |
| --- | --- |
| RAPSN-F | aggaagagagTTTTTAGGTATTTATGGGGTAGGAA |
| RAPSN-R | cagtaatacgactcactatagggagaaggctACCCAAAACCTACCCACTTACTAAA |

**Note：**upper case letters present the sequence specific primer regions, and non-specific tags are

shown in lower case letters.

**Table S2**. *RAPSN* Methylation Levels Stratified by Age and Gender in LC Cases and Controls Respectively

| **Cohort Type (N)** | | **Group (N)** | **Methylation levels** | | | | | | | | | |
| --- | --- | --- | --- | --- | --- | --- | --- | --- | --- | --- | --- | --- |
| **CpG**  **_1.15** | **CpG**  **_2** | **CpG**  **_3.4** | **CpG**  **_5** | **CpG**  **_6** | **CpG**  **_7.14** | **CpG**  **_8** | **CpG**  **_9** | **CpG**  **_10.11** | **CpG**  **_12** |
| Case (221) | Age | < 55 (105) | 0.95 | 0.81 | 0.96 | 0.96 | 0.90 | 0.91 | 0.98 | 0.88 | 0.88 | 0.93 |
| ≥55 (116) | 0.94 | 0.81 | 0.96 | 0.96 | 0.89 | 0.91 | 0.98 | 0.89 | 0.87 | 0.93 |
| *p*-value | 0.582 | 0.845 | 0.188 | 0.250 | 0.452 | 0.549 | 0.914 | 0.628 | 0.742 | 0.744 |
| Gender | male (121) | 0.94 | 0.82 | 0.96 | 0.96 | 0.89 | 0.91 | 0.98 | 0.89 | 0.87 | 0.93 |
| female (100) | 0.95 | 0.81 | 0.96 | 0.96 | 0.90 | 0.92 | 0.98 | 0.88 | 0.89 | 0.93 |
| *p*-value | 0.664 | 0.103 | 0.464 | 0.592 | 0.471 | 0.102 | 0.719 | 0.697 | 0.063 | 0.825 |
| Control (285) | Age | < 55 (151) | 0.94 | 0.80 | 0.96 | 0.96 | 0.89 | 0.91 | 0.97 | 0.88 | 0.88 | 0.92 |
| ≥55 (134) | 0.95 | 0.85 | 0.96 | 0.97 | 0.89 | 0.92 | 0.98 | 0.88 | 0.88 | 0.93 |
| *p*-value | 0.024 | 0.092 | 0.457 | 0.543 | 0.724 | 0.342 | 0.026 | 0.403 | 0.908 | 0.333 |
| Gender | male (142) | 0.94 | 0.81 | 0.96 | 0.96 | 0.88 | 0.91 | 0.98 | 0.88 | 0.88 | 0.92 |
| female (143) | 0.94 | 0.83 | 0.96 | 0.96 | 0.90 | 0.91 | 0.98 | 0.88 | 0.89 | 0.92 |
| *p*-value | 0.450 | 0.998 | 0.552 | 0.276 | 0.038 | 0.319 | 0.569 | 0.774 | 0.010 | 0.478 |

**Note**: *p* < 0.05 was considered as significant difference.

**Abbreviations:** LC, lung cancer.
